# Supplementary material for: Complementary Transcriptomic and Proteomic Analysis in the Substantia Nigra of Parkinson's Disease
Source: PubMed Central journal article supplement (PMC8517625; doi:10.1155/2021/2148820), 2021-10-07
Supplement: 2148820.f1.pdf [file 2148820.f1.pdf]

**Table S1:** The interaction network of 96 molecules was enriched in STRING and artisticized in Cytoscape.

|           |
|-----------|
| RAPH1     |
| DOK6      |
| PLCXD2    |
| SEMA6D    |
| LINC00849 |
| RAB6B     |
| RAB3C     |
| dao       |
| SSTR1     |
| ANKRD29   |
| CELF4     |
| CCDC184   |
| C2orf80   |
| AI590238  |
| SLC8A1    |
| RAB27B    |
| CTXN3     |
| ANKRD50   |
| MACROD2   |
| PGM2L1    |
| BEND4     |
| TMEM178B  |
| KIF26B    |
| KRT222    |
| SNCA      |
| NUP93     |
| AA035730  |
| SLC2A13   |
| KCNJ6     |
| HENMT1    |
| CEP41     |
| TMEM132B  |
| BRWD1     |
| PSMA5     |
| EBF3      |

|          |
|----------|
| AW296451 |
| FSD1L    |
| AA832474 |
| CADPS    |
| LRPAP1   |
| KLHL13   |
| AL041224 |
| FGF12    |
| TIMM23B  |
| AKAP12   |
| SLC10A4  |
| RERG     |
| MIR612   |
| GTF3A    |
| N71087   |
| AI810266 |
| KLHL1    |
| BCL6     |
| WDR37    |
| GABRA4   |
| C7orf61  |
| ZBTB20   |
| NR4A2    |
| ANK1     |
| PCDH8    |
| ATP8A2   |
| FGF13    |
| NRXN3    |
| DLK1     |
| DDC      |
| AGTR1    |
| TPBG     |
| MIA3     |
| RET      |
| SCN3B    |
| ZNF226   |
| PKP4     |
| CADPS2   |

|           |
|-----------|
| CDC42     |
| B3GALNT1  |
| SLC18A2   |
| HIST1H2AC |
| EN1       |
| TH        |
| JMJD6     |
| HIST1H2BD |
| CYB561    |
| CHRN3     |
| RBM3      |
| PEG10     |
| DRD2      |
| DCLK1     |
| IGF1R     |
| TRA2A     |
| SYT1      |
| SLC6A3    |
| ACHE      |
| SYNJ1     |
| P2RX7     |
| RGS4      |
| TMEM255A  |
