# Supplementary material for: Complementary Transcriptomic and Proteomic Analysis in the Substantia Nigra of Parkinson's Disease
Source: PubMed Central journal article supplement (PMC8517625; doi:10.1155/2021/2148820), 2021-10-07
Supplement: 2148820.f2.pdf [file 2148820.f2.pdf]

**Table S2:** 44 molecules were both differentially expressed in profiles transcriptomics and proteomics.

| <b>ID</b> | <b>Ratio</b> | <b>Significant</b> |
|-----------|--------------|--------------------|
| ACHE      | 0.8205       | TRUE               |
| ACP2      | 0.805        | TRUE               |
| AKR1C3    | 1.4898       | TRUE               |
| ALAD      | 1.2783       | TRUE               |
| AP1M1     | 0.9048       | TRUE               |
| APOO      | 0.8652       | TRUE               |
| ATAD1     | 0.8607       | TRUE               |
| ATP6V0A1  | 0.8687       | TRUE               |
| BCAT1     | 0.7865       | TRUE               |
| CACNA2D2  | 0.8509       | TRUE               |
| CADPS     | 0.8165       | TRUE               |
| COX4I1    | 0.8868       | TRUE               |
| CRYAB     | 1.1761       | TRUE               |
| CYB5R3    | 1.1202       | TRUE               |
| EXOC4     | 0.8901       | TRUE               |
| FABP5     | 1.1056       | TRUE               |
| FMNL2     | 1.1123       | TRUE               |
| GBE1      | 0.7878       | TRUE               |
| GFM1      | 0.8145       | TRUE               |
| GLUD1     | 0.8326       | TRUE               |
| HIST1H2BK | 1.2837       | TRUE               |
| IQGAP1    | 1.168        | TRUE               |
| LMNA      | 1.1159       | TRUE               |
| LRPPRC    | 0.7878       | TRUE               |
| OAT       | 0.9087       | TRUE               |
| OGDHL     | 0.8691       | TRUE               |
| PCYOX1L   | 0.7751       | TRUE               |
| PGLS      | 1.1949       | TRUE               |
| PLBD2     | 0.8452       | TRUE               |
| PURA      | 0.7506       | TRUE               |
| RAB2A     | 0.8985       | TRUE               |
| RAB3GAP2  | 0.8343       | TRUE               |
| RCN2      | 0.864        | TRUE               |
| RPS15A    | 0.8676       | TRUE               |
| SAMM50    | 0.8974       | TRUE               |
| SIRPA     | 1.1749       | TRUE               |
| SNX9      | 1.1198       | TRUE               |
| SYNGR1    | 0.8547       | TRUE               |
| TAC1      | 0.8405       | TRUE               |
| TJP2      | 1.7103       | TRUE               |
| TRAPPC6B  | 0.8693       | TRUE               |

|       |        |      |
|-------|--------|------|
| TSM   | 0.8972 | TRUE |
| USP11 | 0.851  | TRUE |
| YWHAH | 0.8805 | TRUE |

---
